# Supplementary material for: Tumor-Homing pH-Sensitive Extracellular Vesicles for Targeting Heterogeneous Tumors
Source: PubMed Central journal article supplement (PMC7238000; doi:10.3390/pharmaceutics12040372), 2020-04-17
Supplement: pharmaceutics-12-00372-s001.pdf [file pharmaceutics-12-00372-s001.pdf]

# Supplementary Materials: Tumor-homing pH-sensitive Extracellular Vesicles for Targeting Heterogeneous Tumors

Jaeduk Park, Hyuk Lee, Yu Seok Youn, Kyung Taek Oh and Eun Seong Lee

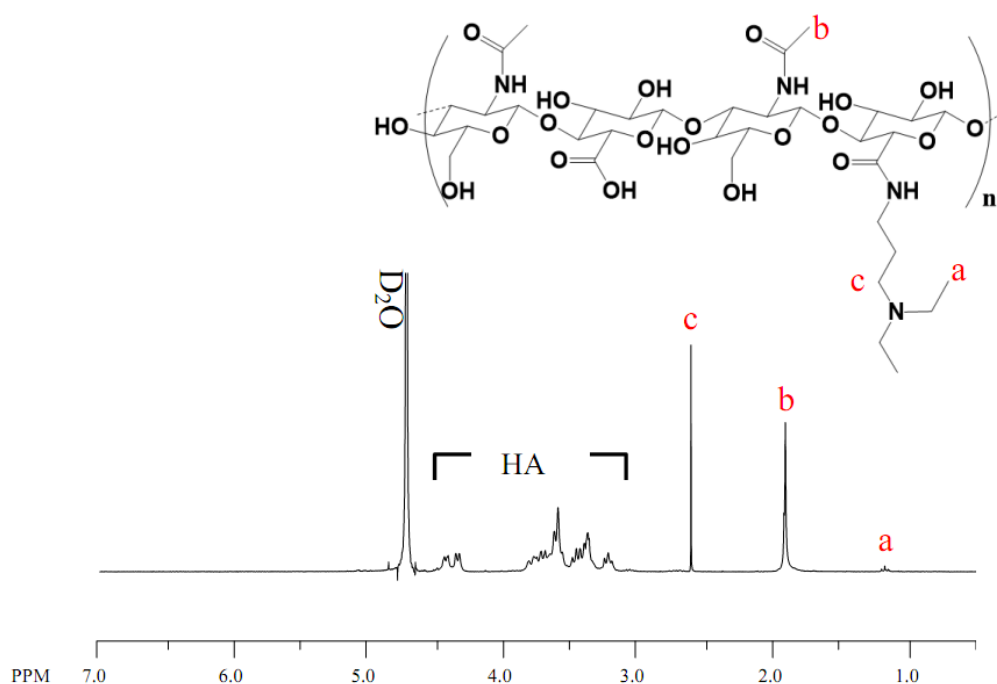

Figure 1. <sup>1</sup>H-NMR analysis of HDEA.

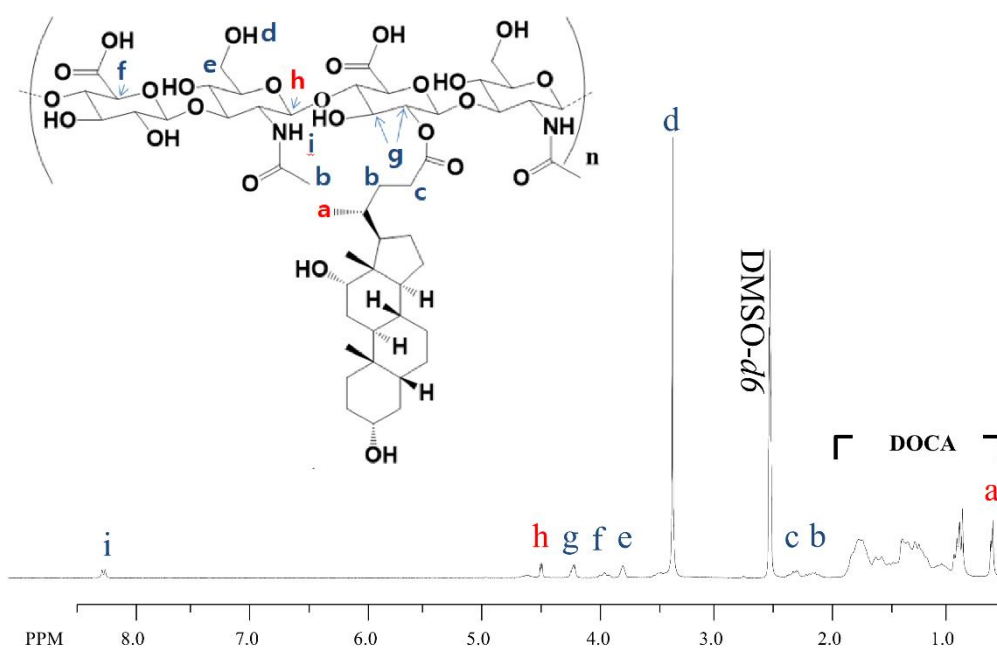

Figure S2. <sup>1</sup>H-NMR analysis of HDOC.

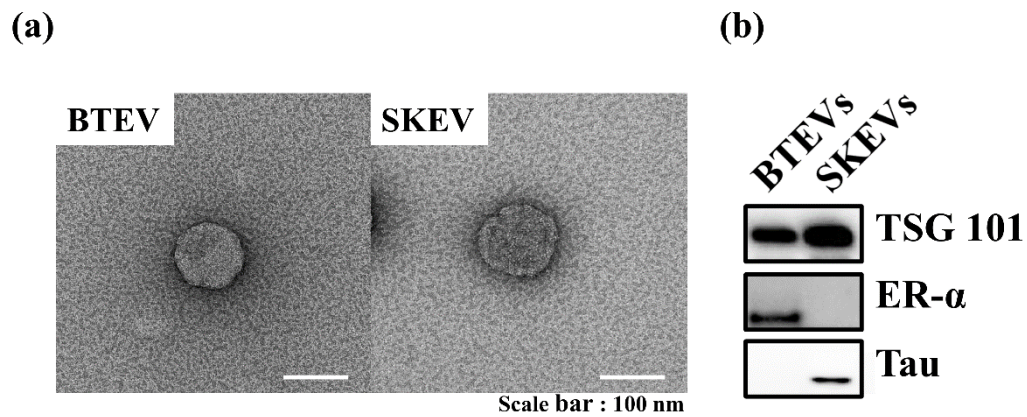

**Figure S3.** TEM analysis of intact (a) BTEV or SKEV. (b) Western blot analysis of the TSG 101 (tumor susceptibility gene 101), ER- $\alpha$  (estrogen receptor alpha), or Tau (tau protein) in BTEVs or SKEVs. To characterize unique protein expression on EVs, primary antibodies [rabbit monoclonal anti-TSG101 antibody (1  $\mu\text{g/mL}$ , Abcam, Cambridge, UK), rabbit monoclonal anti-ER- $\alpha$  antibody (1  $\mu\text{g/mL}$ , Abcam, Cambridge, UK) or rabbit monoclonal anti-Tau antibody (1  $\mu\text{g/mL}$ , Abcam, Cambridge, UK)] and goat anti-rabbit IgG H&L secondary antibody (1  $\mu\text{g/mL}$ , Abcam, Cambridge, UK) were used as primary and secondary antibodies [Chemiluminescent Reagent Kit (Abcam, Cambridge, UK)]. The experiments were performed using Chemi Doc MP System (Bio-Rad, Hercules, CA, USA).
